# Supplementary material
Source: Royal Society of Chemistry journal article supplement (doi:10.1039/d6ay00432f)
Supplement: d6ay00432f1.pdf [file d6ay00432f1.pdf]

### Supplementary Information

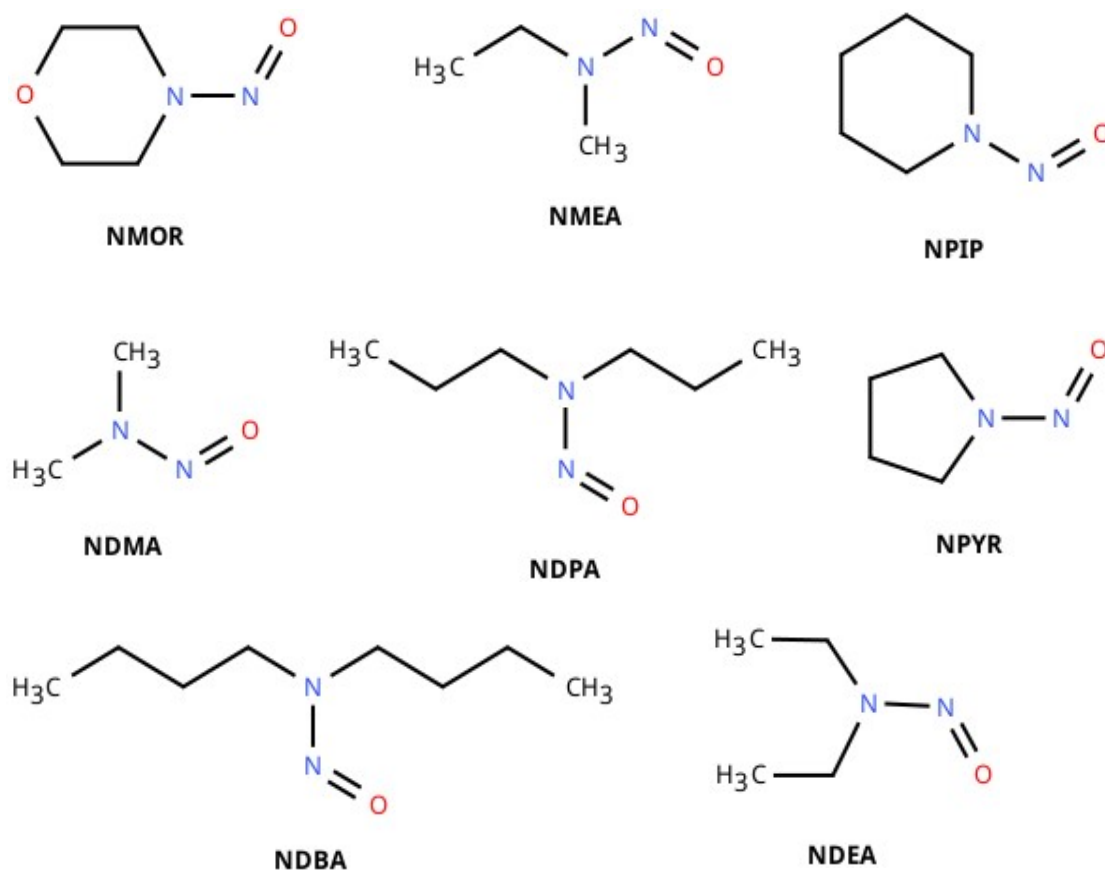

**Fig. S1** Chemical structures of the eight NAMs

**Table S1** Basic information on the eight NAMs

| Compound                  | Abbr | CASN       | Formula                                                     | Molecular Weight |
|---------------------------|------|------------|-------------------------------------------------------------|------------------|
| N-Nitrosodimethylamine    | NDMA | 62-75-9    | C <sub>2</sub> H <sub>6</sub> N <sub>2</sub> O              | 74.08            |
| N-Nitrosomethylethylamine | NMEA | 10595-95-6 | C <sub>3</sub> H <sub>8</sub> N <sub>2</sub> O              | 88.11            |
| N-Nitrosodiethylamine     | NDEA | 55-18-5    | C <sub>4</sub> H <sub>10</sub> N <sub>2</sub> O             | 102.14           |
| N-Nitrosodipropylamine    | NDPA | 621-64-7   | C <sub>6</sub> H <sub>14</sub> N <sub>2</sub> O             | 130.19           |
| N-Nitrosomorpholine       | NMOR | 59-89-2    | C <sub>4</sub> H <sub>8</sub> N <sub>2</sub> O <sub>2</sub> | 116.12           |
| N-Nitrosopyrrolidine      | NPYR | 930-55-2   | C <sub>4</sub> H <sub>8</sub> N <sub>2</sub> O              | 100.12           |
| N-Nitrosopiperidine       | NPIP | 100-75-4   | C <sub>5</sub> H <sub>10</sub> N <sub>2</sub> O             | 114.15           |
| N-Nitrosodibutylamine     | NDBA | 924-16-3   | C <sub>8</sub> H <sub>18</sub> N <sub>2</sub> O             | 158.24           |

**Table S2** Baseline characteristics of participants (n = 60)

| Characteristic                  |               | Mean $\pm$ SD or n (%) |
|---------------------------------|---------------|------------------------|
| Age, years                      | Mean $\pm$ SD | 10.12 $\pm$ 6.50       |
|                                 | 0–6           | 22 (36.7%)             |
|                                 | 6–12          | 20 (33.3%)             |
|                                 | >12           | 18 (30.0%)             |
| Sex                             | Male          | 31 (51.7%)             |
|                                 | Female        | 29 (48.3%)             |
| BMI, kg/m <sup>2</sup>          | Mean $\pm$ SD | 18.26 $\pm$ 4.42       |
| Secondhand smoke exposure (SHS) | Exposed       | 32 (53.3%)             |
|                                 | Unexposed     | 28 (46.7%)             |

**Table S3** Freeze–thaw stability of NDMA and NPYR across three cycles

| NAmS | Cycle | Mean $\pm$ SD     | CV (%) | Mean change (%) | P value |
|------|-------|-------------------|--------|-----------------|---------|
| NDMA | 1     | 2.388 $\pm$ 0.858 | 3.61   | 0               | 0.311   |
| NDMA | 2     | 2.473 $\pm$ 1.009 | 3.49   | 2.29            | 0.311   |
| NDMA | 3     | 2.504 $\pm$ 0.970 | 3.62   | 4.04            | 0.311   |
| NPYR | 1     | 0.390 $\pm$ 0.717 | 4.47   | 0               | 0.779   |
| NPYR | 2     | 0.377 $\pm$ 0.697 | 4.88   | -4.39           | 0.779   |
| NPYR | 3     | 0.409 $\pm$ 0.757 | 5.18   | 0.58            | 0.779   |

**Table S4** Individual freeze-thaw stability of NDMA and NPYR across three cycles

| subject id | sex    | NAMs | cycle 1         | cycle 2         | cycle 3         | P value | BH-adjusted P value |
|------------|--------|------|-----------------|-----------------|-----------------|---------|---------------------|
| P01        | Male   | NDMA | 1.5594 ± 0.0726 | 1.7242 ± 0.0884 | 1.6737 ± 0.0846 | 0.099   | 0.149               |
| P01        | Male   | NPYR | 0.1121 ± 0.0049 | 0.0996 ± 0.0047 | 0.0990 ± 0.0055 | 0.066   | 0.133               |
| P02        | Male   | NDMA | 2.8132 ± 0.1395 | 3.0355 ± 0.1593 | 2.9487 ± 0.1394 | 0.288   | 0.288               |
| P02        | Male   | NPYR | 0.1057 ± 0.0059 | 0.1084 ± 0.0045 | 0.1053 ± 0.0047 | 0.587   | 0.587               |
| P03        | Male   | NDMA | 2.9593 ± 0.1428 | 2.9608 ± 0.1238 | 3.1719 ± 0.1626 | 0.288   | 0.288               |
| P03        | Male   | NPYR | 0.2842 ± 0.0110 | 0.2671 ± 0.0143 | 0.3099 ± 0.0157 | 0.058   | 0.133               |
| P04        | Female | NDMA | 1.6706 ± 0.0589 | 1.5125 ± 0.0415 | 1.7609 ± 0.0337 | 0.027   | 0.082               |
| P04        | Female | NPYR | N.D.            | N.D.            | N.D.            | -       | -                   |
| P05        | Female | NDMA | 1.7108 ± 0.0440 | 1.6130 ± 0.0439 | 1.5688 ± 0.0624 | 0.051   | 0.102               |
| P05        | Female | NPYR | N.D.            | N.D.            | N.D.            | -       | -                   |
| P06        | Female | NDMA | 3.6170 ± 0.0416 | 3.9936 ± 0.0359 | 3.8999 ± 0.0360 | 0.027   | 0.082               |
| P06        | Female | NPYR | 1.8386 ± 0.0736 | 1.7847 ± 0.0954 | 1.9369 ± 0.1082 | 0.301   | 0.402               |
